# Supplementary material for: Paper spray mass spectrometry combined with machine learning as a rapid diagnostic for chronic kidney disease
Source: Royal Society of Chemistry journal article supplement (doi:10.1039/d4an00099d), 2024-01-01
Supplement: d4an00099d1.pdf [file d4an00099d1.pdf]

## ELECTRONIC SUPPLEMENTARY INFORMATION

### Paper spray mass spectrometry combined with machine learning as a rapid diagnostic for chronic kidney disease

Igor Pereira<sup>1</sup>, Jindar N. S. Sbotto<sup>1</sup>, Jason L. Robinson<sup>2</sup>, and Chris G. Gill<sup>1, 3, 4, 5\*</sup>

- <sup>1</sup> Applied Environmental Research Laboratories (AERL), Chemistry Department, Vancouver Island University, Nanaimo, BC, Canada, V9R 5S5  
<sup>2</sup> Health PEI, Charlottetown, PEI, Canada, C1A 7N8  
<sup>3</sup> Chemistry Department, University of Victoria, Victoria, BC, Canada, V8P 5C2  
<sup>4</sup> Chemistry Department, Simon Fraser University, Burnaby, BC, Canada, V5A 1S6  
<sup>5</sup> Department of Occupational and Environmental Health Sciences, University of Washington, Seattle, WA, United States, 98195-1618

**\*Address correspondence to:**

Professor Chris G. Gill, Ph.D., P. Chem.  
Co-Director, Applied Environmental Research Laboratories (AERL)  
Department of Chemistry  
Vancouver Island University  
900 Fifth Street, Nanaimo, BC, Canada, V9R 5S5

Ph: 250-753-3245  
chris.gill@viu.ca

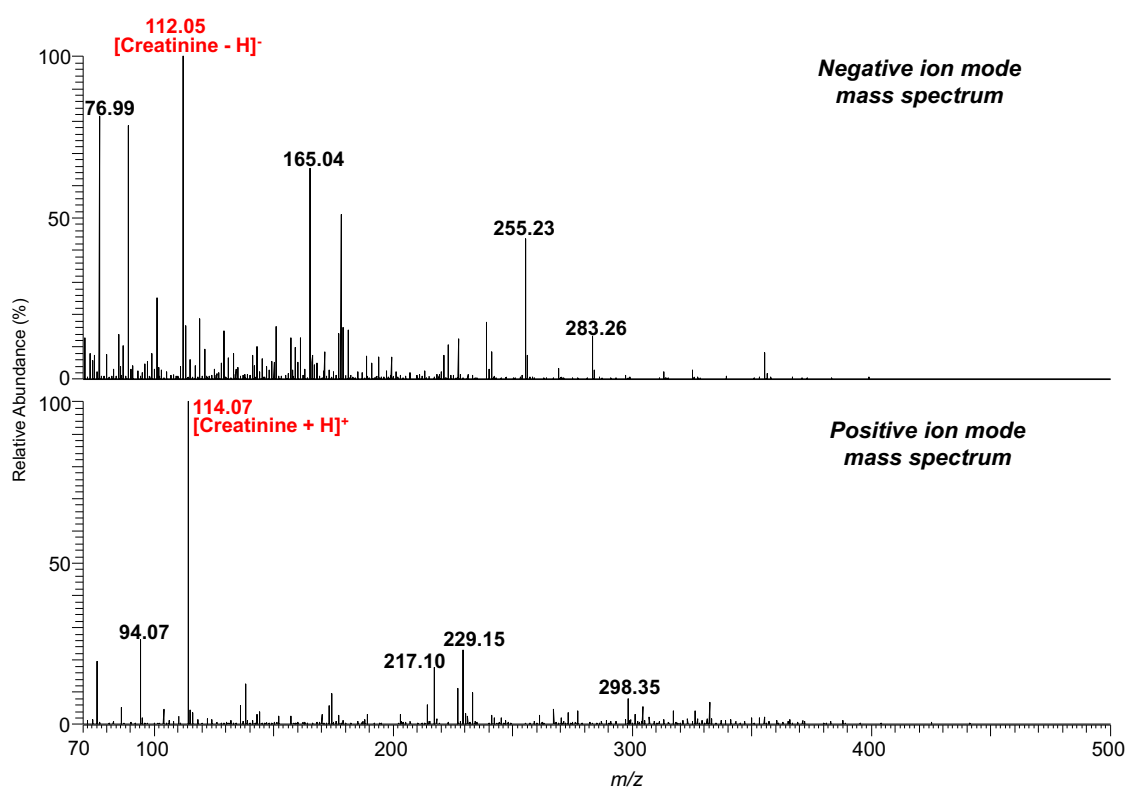

**Fig. S1** Representative negative and positive ion mode PS-MS mass spectra for obtained for a healthy anonymous patient urine sample.

**Table S1** Albumin-to-creatinine ratio (ACR) concentrations (mg mmol<sup>-1</sup>) in 80 (healthy = 40; diseased = 40) anonymous human patient urine samples

| Sample | ACR values<br>(mg mmol <sup>-1</sup> ) | Classification |
|--------|----------------------------------------|----------------|
| 1      | 0.4                                    | Healthy        |
| 2      | 0.5                                    | Healthy        |
| 3      | 0.5                                    | Healthy        |
| 4      | 0.5                                    | Healthy        |
| 5      | 0.5                                    | Healthy        |
| 6      | 0.5                                    | Healthy        |
| 7      | 0.5                                    | Healthy        |
| 8      | 0.6                                    | Healthy        |
| 9      | 0.6                                    | Healthy        |
| 10     | 0.7                                    | Healthy        |
| 11     | 0.7                                    | Healthy        |
| 12     | 0.7                                    | Healthy        |
| 13     | 0.7                                    | Healthy        |
| 14     | 0.8                                    | Healthy        |
| 15     | 0.8                                    | Healthy        |
| 16     | 0.8                                    | Healthy        |
| 17     | 0.8                                    | Healthy        |
| 18     | 0.8                                    | Healthy        |
| 19     | 0.8                                    | Healthy        |
| 20     | 0.9                                    | Healthy        |
| 21     | 0.9                                    | Healthy        |
| 22     | 1.0                                    | Healthy        |
| 23     | 1.0                                    | Healthy        |
| 24     | 1.0                                    | Healthy        |
| 25     | 1.0                                    | Healthy        |
| 26     | 1.0                                    | Healthy        |
| 27     | 1.0                                    | Healthy        |
| 28     | 1.1                                    | Healthy        |
| 29     | 1.1                                    | Healthy        |
| 30     | 1.1                                    | Healthy        |
| 31     | 1.2                                    | Healthy        |
| 32     | 1.2                                    | Healthy        |
| 33     | 1.2                                    | Healthy        |
| 34     | 1.2                                    | Healthy        |
| 35     | 1.3                                    | Healthy        |
| 36     | 1.5                                    | Healthy        |
| 37     | 1.5                                    | Healthy        |
| 38     | 1.6                                    | Healthy        |
| 39     | 1.6                                    | Healthy        |
| 40     | 1.8                                    | Healthy        |

|    |        |          |
|----|--------|----------|
| 41 | 3.7    | Diseased |
| 42 | 4.0    | Diseased |
| 43 | 5.9    | Diseased |
| 44 | 7.5    | Diseased |
| 45 | 7.9    | Diseased |
| 46 | 10.3   | Diseased |
| 47 | 12.4   | Diseased |
| 48 | 13.8   | Diseased |
| 49 | 15.4   | Diseased |
| 50 | 15.6   | Diseased |
| 51 | 17.6   | Diseased |
| 52 | 23.9   | Diseased |
| 53 | 24.0   | Diseased |
| 54 | 24.8   | Diseased |
| 55 | 25.7   | Diseased |
| 56 | 27.4   | Diseased |
| 57 | 30.3   | Diseased |
| 58 | 30.4   | Diseased |
| 59 | 31.6   | Diseased |
| 60 | 32.0   | Diseased |
| 61 | 34.1   | Diseased |
| 62 | 34.7   | Diseased |
| 63 | 42.4   | Diseased |
| 64 | 56.2   | Diseased |
| 65 | 66.4   | Diseased |
| 66 | 69.0   | Diseased |
| 67 | 76.1   | Diseased |
| 68 | 80.2   | Diseased |
| 69 | 98.8   | Diseased |
| 70 | 108.0  | Diseased |
| 71 | 126.5  | Diseased |
| 72 | 153.3  | Diseased |
| 73 | 172.0  | Diseased |
| 74 | 206.9  | Diseased |
| 75 | 224.0  | Diseased |
| 76 | 260.5  | Diseased |
| 77 | 270.1  | Diseased |
| 78 | 319.4  | Diseased |
| 79 | 375.0  | Diseased |
| 80 | 1342.3 | Diseased |

---

**Table S2** Albumin-to-creatinine ratio (ACR) concentrations (mg mmol<sup>-1</sup>) in 24 (healthy = 12; diseased = 12) anonymous human patient urine samples used as test dataset

| Sample | ACR values<br>(mg mmol <sup>-1</sup> ) | Classification |
|--------|----------------------------------------|----------------|
| 1      | 0.5                                    | Healthy        |
| 2      | 0.8                                    | Healthy        |
| 3      | 0.9                                    | Healthy        |
| 4      | 0.9*                                   | Healthy        |
| 5      | 0.9*                                   | Healthy        |
| 6      | 1.0                                    | Healthy        |
| 7      | 1.1                                    | Healthy        |
| 8      | 1.2*                                   | Healthy        |
| 9      | 1.3*                                   | Healthy        |
| 10     | 1.5                                    | Healthy        |
| 11     | 1.8*                                   | Healthy        |
| 12     | 1.9*                                   | Healthy        |
| 13     | 3.2*                                   | Diseased       |
| 14     | 3.3*                                   | Diseased       |
| 15     | 3.7*                                   | Diseased       |
| 16     | 4.2*                                   | Diseased       |
| 17     | 4.6*                                   | Diseased       |
| 18     | 7.9                                    | Diseased       |
| 19     | 12.4                                   | Diseased       |
| 20     | 13.8                                   | Diseased       |
| 21     | 18.7*                                  | Diseased       |
| 22     | 32.0                                   | Diseased       |
| 23     | 80.2                                   | Diseased       |
| 24     | 98.8                                   | Diseased       |

\*Samples from a new batch. The remaining samples are from the batch shown in Table S1.

**Table S3** Tentative annotation for 10 features ( $m/z$ ) measured in negative ionization mode PS-MS selected by the random forest machine learning method

| Tentative attribution       | Molecular formula                               | $m/z$ [M-H] <sup>-</sup> | Mass error (ppm) | MDA*      | Level            | References** |
|-----------------------------|-------------------------------------------------|--------------------------|------------------|-----------|------------------|--------------|
| Azelaic acid                | C <sub>9</sub> H <sub>16</sub> O <sub>4</sub>   | 187.09769                | 0.576            | 0.0022960 | Down in diseased | S1           |
| 3-Hydroxycapric acid        | C <sub>10</sub> H <sub>20</sub> O <sub>3</sub>  | 187.13409                | 0.653            | 0.0021812 | Up in diseased   | S2           |
| 1,4-Dichlorobenzene         | C <sub>6</sub> H <sub>4</sub> Cl <sub>2</sub>   | 144.96185                | 0.835            | 0.0020376 | Up in diseased   | S3           |
| cis-2-Methylnaconitic acid  | C <sub>7</sub> H <sub>8</sub> O <sub>6</sub>    | 187.02491                | 0.528            | 0.0019953 | Down in diseased | S4           |
| Dimethyl sulfone            | C <sub>2</sub> H <sub>6</sub> O <sub>2</sub> S  | 93.00162                 | 0.501            | 0.0019354 | Up in diseased   | S5           |
| 2,4-Dichlorophenol          | C <sub>6</sub> H <sub>4</sub> Cl <sub>2</sub> O | 160.95671                | 0.413            | 0.0018158 | Up in diseased   | S2           |
| 3-Hydroxyisovaleric acid    | C <sub>5</sub> H <sub>10</sub> O <sub>3</sub>   | 117.05580                | 0.705            | 0.0016848 | Down in diseased | S6           |
| L-1-pyrroline-5-carboxylate | C <sub>5</sub> H <sub>7</sub> NO <sub>2</sub>   | 112.04047                | 0.609            | 0.0016550 | Down in diseased | S7           |
| p-Aminobenzoic acid         | C <sub>7</sub> H <sub>7</sub> NO <sub>2</sub>   | 136.04051                | 0.795            | 0.0012424 | Down in diseased | S8           |
| 4-Hydroxyphenylpyruvic acid | C <sub>9</sub> H <sub>8</sub> O <sub>4</sub>    | 179.03509                | 0.603            | 0.0010013 | Down in diseased | S9           |

\*Mean Decrease Accuracy (random forest ranking score)

\*\*Published data relating each annotated compound to kidney disease

**Table S4** Albumin-to-creatinine ratio (ACR) concentrations ( $\text{mg mmol}^{-1}$ ) in anonymous human patient urine samples ( $N = 60$ ) subdivided into normoalbuminuria ( $<3 \text{ mg mmol}^{-1}$ ,  $N = 20$ ), microalbuminuria ( $3\text{-}30 \text{ mg mmol}^{-1}$ ,  $N = 20$ ), and macroalbuminuria ( $>30 \text{ mg mmol}^{-1}$ ,  $N = 20$ )

| Sample | ACR values<br>( $\text{mg mmol}^{-1}$ ) | Classification   |
|--------|-----------------------------------------|------------------|
| 1      | 0.4                                     | Normoalbuminuria |
| 2      | 0.5                                     | Normoalbuminuria |
| 3      | 0.5                                     | Normoalbuminuria |
| 4      | 0.5                                     | Normoalbuminuria |
| 5      | 0.5                                     | Normoalbuminuria |
| 6      | 0.5                                     | Normoalbuminuria |
| 7      | 0.5                                     | Normoalbuminuria |
| 8      | 0.6                                     | Normoalbuminuria |
| 9      | 0.6                                     | Normoalbuminuria |
| 10     | 0.7                                     | Normoalbuminuria |
| 11     | 0.7                                     | Normoalbuminuria |
| 12     | 0.7                                     | Normoalbuminuria |
| 13     | 0.7                                     | Normoalbuminuria |
| 14     | 0.8                                     | Normoalbuminuria |
| 15     | 0.8                                     | Normoalbuminuria |
| 16     | 0.8                                     | Normoalbuminuria |
| 17     | 0.9                                     | Normoalbuminuria |
| 18     | 1.5                                     | Normoalbuminuria |
| 19     | 1.6                                     | Normoalbuminuria |
| 20     | 1.6                                     | Normoalbuminuria |
| 21     | 3.3                                     | Microalbuminuria |
| 22     | 3.7                                     | Microalbuminuria |
| 23     | 4.0                                     | Microalbuminuria |
| 24     | 4.2                                     | Microalbuminuria |
| 25     | 4.6                                     | Microalbuminuria |
| 26     | 5.9                                     | Microalbuminuria |
| 27     | 6.9                                     | Microalbuminuria |
| 28     | 7.5                                     | Microalbuminuria |
| 29     | 7.9                                     | Microalbuminuria |
| 30     | 10.3                                    | Microalbuminuria |
| 31     | 12.4                                    | Microalbuminuria |
| 32     | 13.8                                    | Microalbuminuria |
| 33     | 15.4                                    | Microalbuminuria |
| 34     | 15.6                                    | Microalbuminuria |
| 35     | 17.6                                    | Microalbuminuria |
| 36     | 23.9                                    | Microalbuminuria |
| 37     | 24.0                                    | Microalbuminuria |
| 38     | 24.8                                    | Microalbuminuria |

|    |        |                  |
|----|--------|------------------|
| 39 | 25.7   | Microalbuminuria |
| 40 | 27.4   | Microalbuminuria |
| 41 | 34.1   | Macroalbuminuria |
| 42 | 34.7   | Macroalbuminuria |
| 43 | 42.4   | Macroalbuminuria |
| 44 | 56.2   | Macroalbuminuria |
| 45 | 66.4   | Macroalbuminuria |
| 46 | 69.0   | Macroalbuminuria |
| 47 | 76.1   | Macroalbuminuria |
| 48 | 80.2   | Macroalbuminuria |
| 49 | 98.8   | Macroalbuminuria |
| 50 | 108.0  | Macroalbuminuria |
| 51 | 126.5  | Macroalbuminuria |
| 52 | 153.3  | Macroalbuminuria |
| 53 | 172.0  | Macroalbuminuria |
| 54 | 206.9  | Macroalbuminuria |
| 55 | 224.0  | Macroalbuminuria |
| 56 | 260.5  | Macroalbuminuria |
| 57 | 270.1  | Macroalbuminuria |
| 58 | 319.4  | Macroalbuminuria |
| 59 | 375.0  | Macroalbuminuria |
| 60 | 1342.3 | Macroalbuminuria |

---



## References

- (S1) A. Hirayama, E. Nakashima, M. Sugimoto, S. Akiyama, W. Sato, S. Maruyama, S. Matsuo, M. Tomita, Y. Yuzawa and T. Soga, *Anal. Bioanal. Chem.*, 2012, **404**, 3101–3109.
- (S2) I. Barla, P. Efentakis, S. Lamprou, M. Gavriatopoulou, M.-A. Dimopoulos, E. Terpos, I. Andreadou, N. Thomaidis and E. Gikas, *Molecules*, 2022, **27**, 7929.
- (S3) W. Liu, S. Cao, J. Ma, D. Shi, L. Yu, Z. Ye, M. Yang, B. Wang and W. Chen, *Environ. Sci. Pollut. Res.*, 2023, **30**, 7605–7616.
- (S4) T. Wu, G. Xie, Y. Ni, T. Liu, M. Yang, H. Wei, W. Jia and G. Ji, *J. Proteome Res.*, 2015, **14**, 447–456.
- (S5) A. Mika, W. Wojtowicz, A. Zabek, P. Młynarz, M. Chmielewski, T. Sledzinski and P. Stepnowski, *J. Pharm. Biomed. Anal.*, 2018, **149**, 1–8.
- (S6) K. Sharma, B. Karl, A. V. Mathew, J. A. Gangoiti, C. L. Wassel, R. Saito, M. Pu, S. Sharma, Y.-H. You, L. Wang, M. Diamond-Stanic, M. T. Lindenmeyer, C. Forsblom, W. Wu, J. H. Ix, T. Ideker, J. B. Kopp, S. K. Nigam, C. D. Cohen, P.-H. Groop, B. A. Barshop, L. Natarajan, W. L. Nyhan and R. K. Naviaux, *J. Am. Soc. Nephrol.*, 2013, **24**, 1901–1912.
- (S7) P. Cao, Y. Kang, J. Liu, X. Liu, Y. Jin and Z. Zhang, *Hum. Exp. Toxicol.*, 2022, **41**.
- (S8) S. A. Bingham, J. Murphy, E. Waller, S. A. Runswick, G. Neale, D. Evans and J. H. Cummings, *Eur. J. Clin. Nutr.*, 1992, **46**, 131–135.
- (S9) J. Lunyera, C. J. Diamantidis, H. B. Bosworth, U. D. Patel, J. Bain, M. J. Muehlbauer, O. Ilkayeva, M. Nguyen, B. Sharma, J. Z. Ma, S. H. Shah and J. J. Scialla, *Metabolomics*, 2022, **18**, 5.
